# Supplementary material
Source: Springer Nature journal article supplement (https://www.springermedizin.de/resource/supplementary/12881_2005_104_MOESM2_ESM.pdf/9452426)
Supplement: MOESM2 [file 9452426]

Download variants (filter) - Search sequence variants

Total results: 50.

| Exon | DNA Allele 1                            | RE-Site         | DNA Allele 2 | RNA | Protein         | Frequency | Disease                              | Reference                                  |
|------|-----------------------------------------|-----------------|--------------|-----|-----------------|-----------|--------------------------------------|--------------------------------------------|
| 1    | c.-11_131del (Whole Gene Deletion)      |                 | -            |     | p.?             |           | PGL                                  | <a href="#">McWhinnie</a>                  |
| 1    | c.1A>G                                  |                 | -            |     | p.Het17         |           | CB & Vagal, Jugular and Tympanic PGL | <a href="#">Bismuth</a>                    |
| 1    | c.3G>C                                  | +BstXI, +DpnI   | -            |     | p.Het17         |           | CB & Vagal PGL & PC & EA PGL         | <a href="#">Bedenhop, Lee, Bedenhop</a>    |
| 1    | c.14G>A                                 | +XbaI, -BstI    | -            |     | p.Ter38         |           | Multifocal and EA PGL, PC, PGL       | <a href="#">Neumann, Neumann, Bedenhop</a> |
| 1    | c.33C>A                                 | +HindI, -AclI   | -            |     | p.Cys11X        |           | Multifocal and EA PGL                | <a href="#">Neumann, Neumann</a>           |
| 1    | c.34G>A<br><a href="#">Full details</a> | +HpyCHV, -NheIV | -            |     | p.Gly12Ser      | 2.5 - 5%  | Normal                               | <a href="#">Taschner, Grimm, Masucha</a>   |
| 1    | c.36_37delTG                            | +HaeIII, -NheIV | -            |     | p.Ala13Profs455 |           | Multifocal and EA PGL                | <a href="#">Neumann, Neumann</a>           |
